# Supplementary material for: A biocompatible cell cryoprotectant based on sulfoxide-containing amino acids: mechanism and application
Source: Royal Society of Chemistry journal article supplement (doi:10.1039/d3tb00005b), 2023-01-01
Supplement: d3tb00005b1.pdf [file d3tb00005b1.pdf]

## Supporting information

### **A biocompatible cell cryoprotectant based on sulphoxide containing amino acids: mechanism and application**

Min Liu,<sup>a</sup> Changhong Chen,<sup>a</sup> Lei Liang,<sup>a</sup> Chaojie Yu,<sup>a</sup> Bingyan Guo,<sup>a</sup> Haitao Zhang,<sup>a</sup> Yuwei Qiu,<sup>a</sup> Hong Zhang,<sup>a,c</sup> Fanglian Yao,<sup>\*a,b</sup> and Junjie Li<sup>\*a,b,c</sup>

<sup>a</sup> *Department of Polymer Science, School of Chemical Engineering and Technology, Tianjin University, Tianjin, 300072, China*

<sup>b</sup> *Key Laboratory of Systems Bioengineering (Ministry of Education), Tianjin University, Tianjin 300350, China*

*Email address: fanglianyao@tju.edu.cn; li41308@tju.edu.cn.*

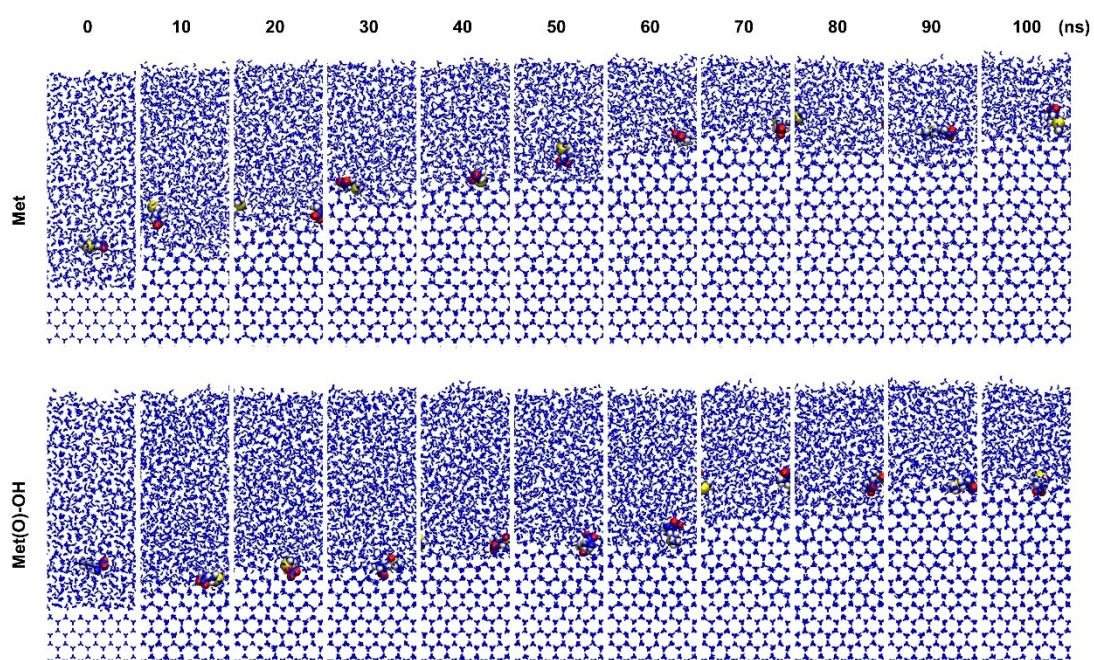

**Fig. S1.** Snapshots of representative groups of Met and Met(O)-OH-ice-water systems during 0-100 ns, which were randomly selected.

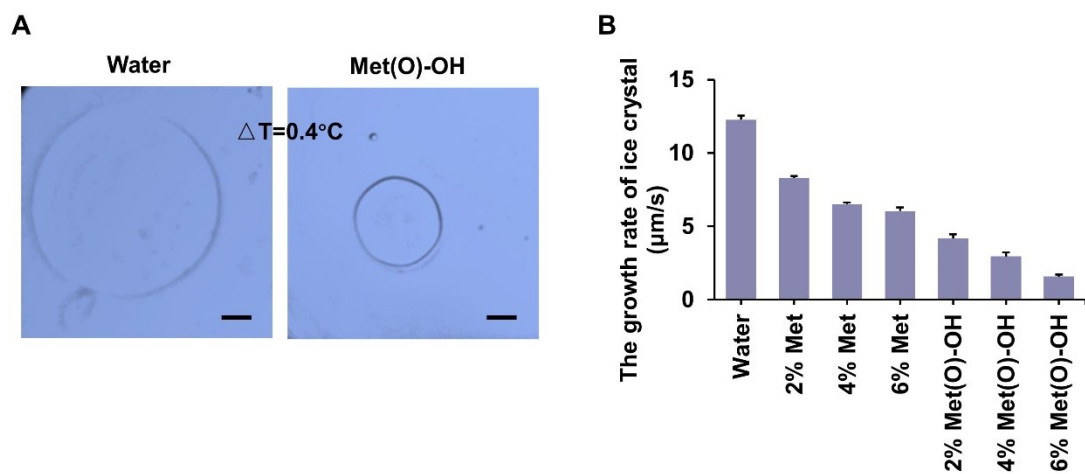

**Fig. S2.** (A) Optical images of the ice crystal shape and (B) ice growth rates of different Met and Met(O)-OH solutions ( $\Delta T$ : temperature below the equilibrium melting temperature).

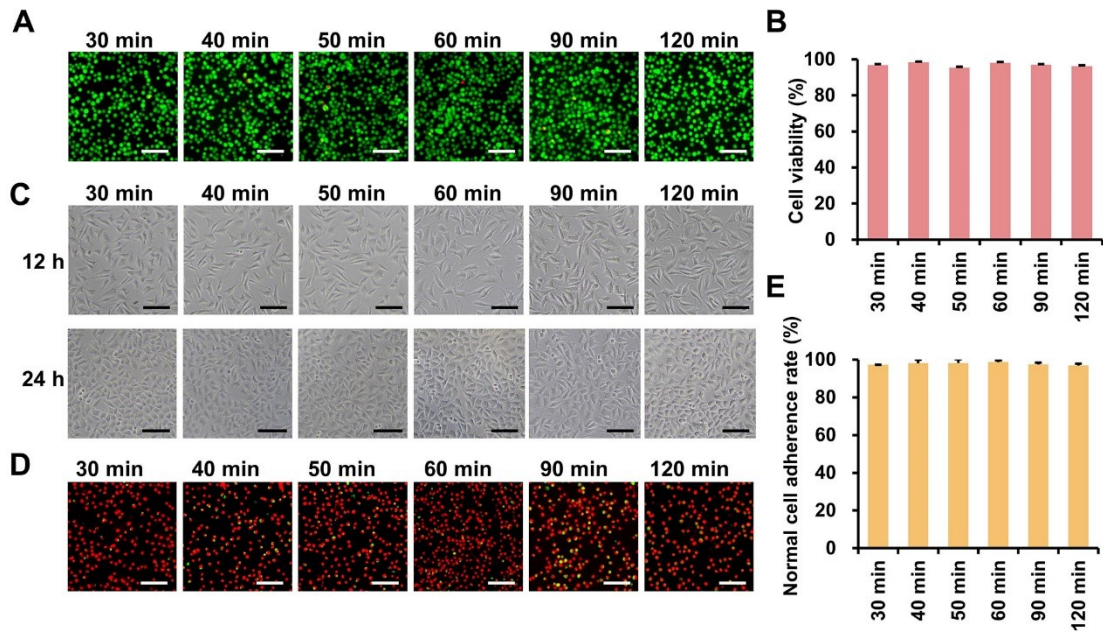

**Fig. S3.** Cytotoxicity evaluation of 2% Met. (A) Fluorescence images of the live/dead assay, (B) cell viability, (C) phase contrast images, (D) fluorescence images of the live/dead assay of L929 cells cryopreserved with the ultrarapid freezing protocol, and (E) normal L929 cell adherence rate after exposure in 2% Met for 30, 40, 50, 60, 90, and 120 min. Green, live cells; Red, dead cells. Scale bar = 100  $\mu$ m. Value = mean  $\pm$  standard deviation,  $n \geq 3$ .

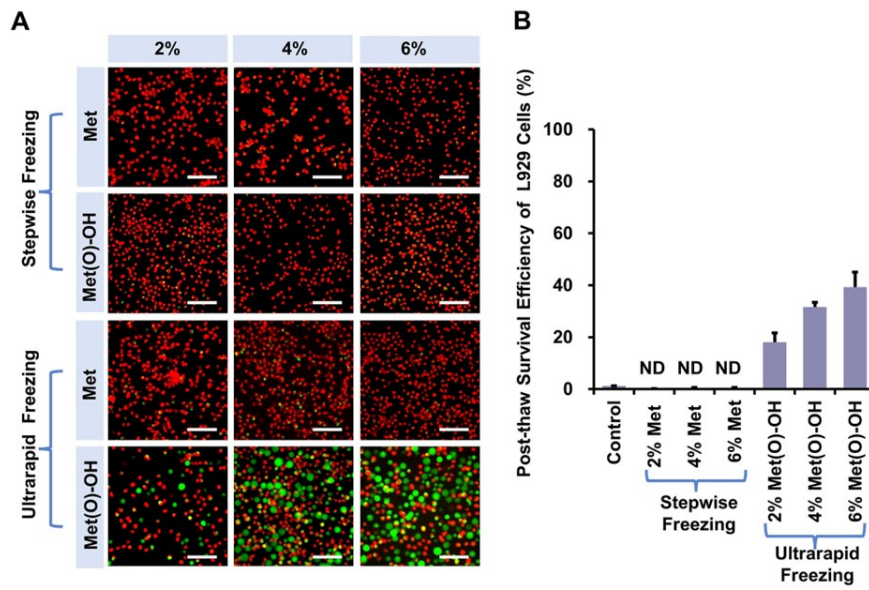

**Fig. S4.** Cell cryopreservation using Met and Met(O)-OH. (A) Fluorescence images of the live/dead staining images of L929 cells after post-thaw. (B) Post-thaw survival efficiency of L929 cells using stepwise freezing protocol and ultrarapid freezing protocol. Green: live cells. Red: dead cells. ND: not detected. Value = mean  $\pm$  standard deviation,  $n \geq 3$ .

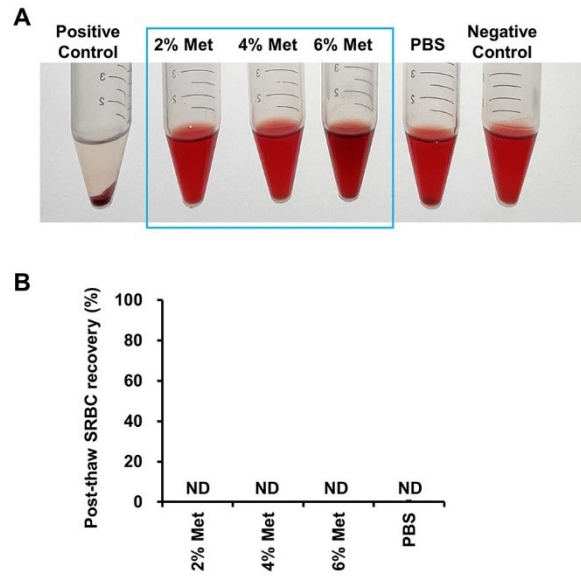

Fig. S5. The SRBC cryopreservation using Met with ultrarapid freezing. (A) Photos of SRBC hemolysis after cryopreservation with different concentrations of 2% Met, 4% Met, and 6% Met. PBS (0% hemolysis, 100% SRBC survival) as positive control and H<sub>2</sub>O (100% hemolysis, 0% SRBC survival) as negative control. (B) Post-thaw cryopreservation efficiency of SRBC after cryopreservation with different concentrations of 2-6% Met. ND: not detected.
